# Supplementary material
Source: publisher figshare collection journal article supplement (https://gsajournals.figshare.com/ndownloader/files/15051599)
Supplement: Supplementary file 1 [file 15051599]

## Sheet: Table S11
Table S11. Enriched KEGG pathways in trametinib-treated versus vehicle-treated tg melanoma medaka.
Database:KEGG pathway	ID	fold enrichment; p-val
Sulfur relay system	ID:04122	O=2;E=0.01;R=246.44;rawP=2.87e-05
Cysteine and methionine metabolism	ID:00270	O=2;E=0.03;R=68.46;rawP=0.0004
MAPK signaling pathway	ID:04010	O=3;E=0.22;R=13.79;rawP=0.0013
Insulin signaling pathway	ID:04910	O=2;E=0.11;R=17.86;rawP=0.0056
Jak-STAT signaling pathway	ID:04630	O=2;E=0.13;R=15.90;rawP=0.0071
Chemokine signaling pathway	ID:04062	O=2;E=0.15;R=13.04;rawP=0.0103
Focal adhesion	ID:04510	O=2;E=0.16;R=12.32;rawP=0.0115
Neuroactive ligand-receptor interaction	ID:04080	O=2;E=0.22;R=9.06;rawP=0.0206
Metabolic pathways	ID:01100	O=3;E=0.92;R=3.27;rawP=0.0632
